# Supplementary material for: A Dual‐Salt Gel Polymer Electrolyte with 3D Cross‐Linked Polymer Network for Dendrite‐Free Lithium Metal Batteries
Source: PubMed Central journal article supplement (PMC6145227; doi:10.1002/advs.201800559), 2018-07-13
Supplement: ADVS-5-1800559-s001.pdf [file ADVS-5-1800559-s001.pdf]

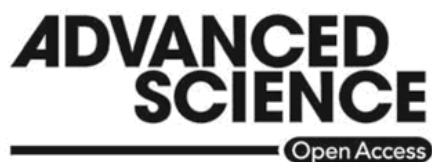

## Supporting Information

for *Adv. Sci.*, DOI: 10.1002/adv.201800559

A Dual-Salt Gel Polymer Electrolyte with 3D Cross-Linked Polymer Network for Dendrite-Free Lithium Metal Batteries

*Wei Fan, Nian-Wu Li, Xiuling Zhang, Shuyu Zhao, Ran Cao, Yingying Yin, Yi Xing, Jiaona Wang, Yu-Guo Guo,\* and Congju Li\**

Copyright WILEY-VCH Verlag GmbH & Co. KGaA, 69469 Weinheim, Germany, 2016.

## Supporting Information

### A Dual-Salt Gel Polymer Electrolyte with 3D cross-linked Polymer Network for Dendrite-Free Lithium Metal Batteries

Wei Fan<sup>1,†</sup>, Nian-Wu Li<sup>1,†</sup>, Xiuling Zhang<sup>1,†</sup>, Shuyu Zhao<sup>2</sup>, Ran Cao<sup>1</sup>, Yingying Yin<sup>1</sup>, Yi Xing<sup>2</sup>, Jiaona Wang<sup>4</sup>, Yu-Guo Guo<sup>3,\*</sup>, Congju Li<sup>1,2,\*</sup>

#### Supporting information

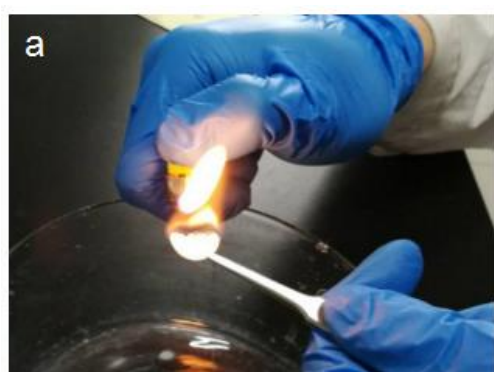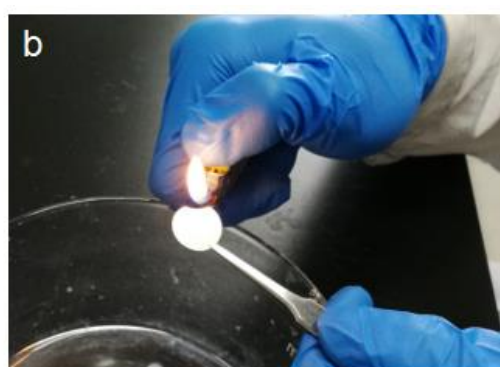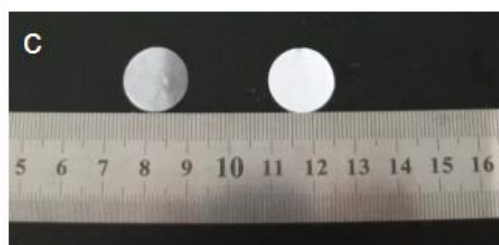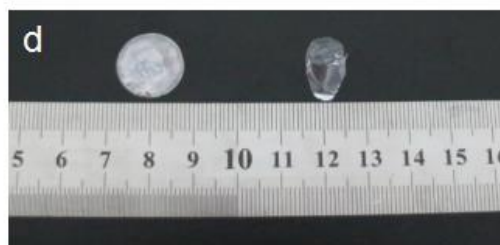

**Figure S1.** Combustion testing of a) Commercial PE separator, b) PGE membrane. Comparison photographs of the thermal shrinkage of the 3D cross-linking membrane (left) and a commercial separator (right) c) before and d) after exposure to 150 °C for 10 min.

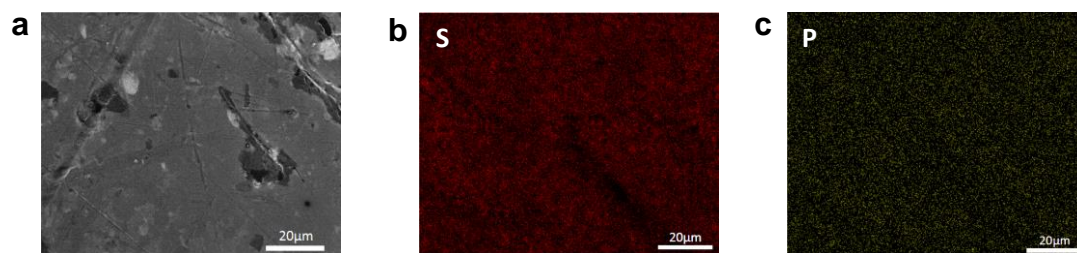

**Figure S2.** a) SEM of morphology of GPE; b) EDS map of P-K; c) S-K of surface section.

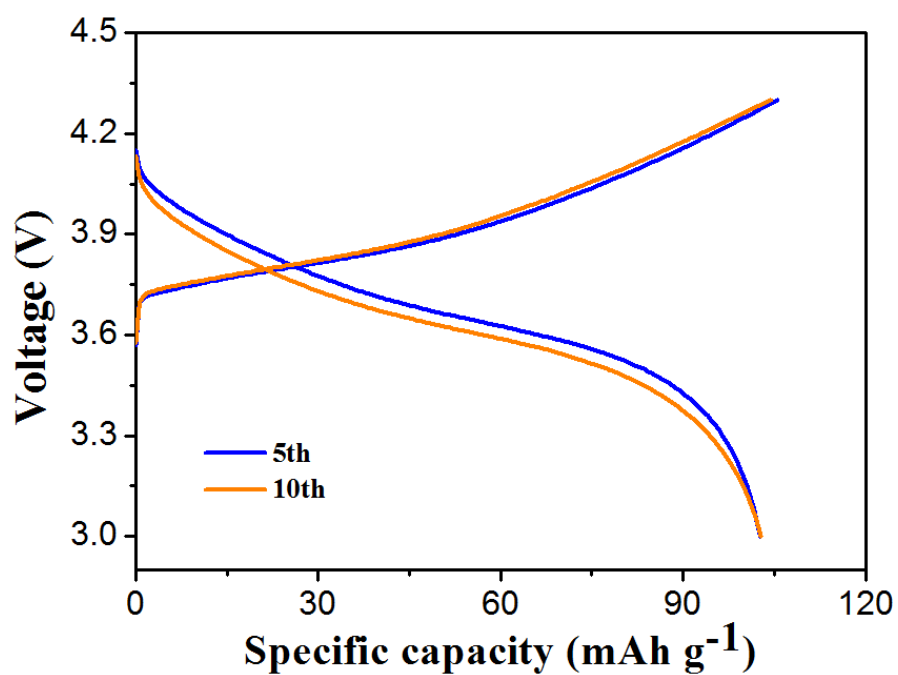

**Figure S3.** Charging-Discharging curves of the fifth and tenth cycle of Li|NCM at 0.5C at 25 °C. The charging-discharging range is 3.0V-4.3V.

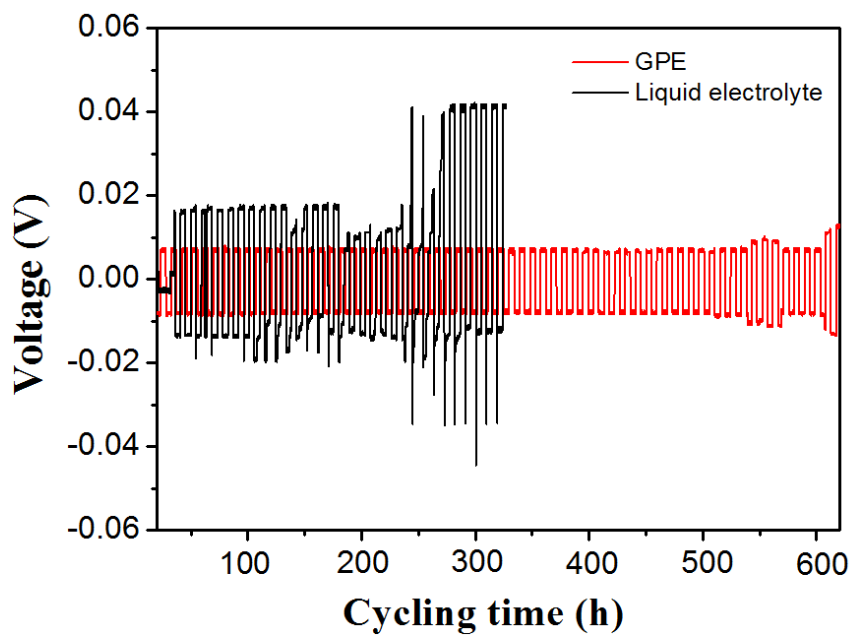

**Figure S4.** Polarization test by using Li|GPE|Li symmetric cells and liquid electrolyte

|                        | <b>Ionic conductivity (mS/cm)</b> |
|------------------------|-----------------------------------|
| <b>PEGDA:ETPTA=1:1</b> | 0.04                              |
| <b>PEGDA:ETPTA=3:2</b> | 0.25                              |
| <b>PEGDA:ETPTA=4:1</b> | 0.56                              |
| <b>ETPTA</b>           | 0.18                              |

**Figure S5.** Ionic conductivity of different polymer constitution.

|                           | <b>LiPF<sub>6</sub></b> | <b>LiTFSI</b> | <b>Dual Li salts</b> |
|---------------------------|-------------------------|---------------|----------------------|
| <b>Ionic conductivity</b> |                         |               |                      |
| (mS/cm)                   | 0.12                    | 0.16          | 0.56                 |

**Figure S6.** Ionic conductivity of different Li salt constitution.

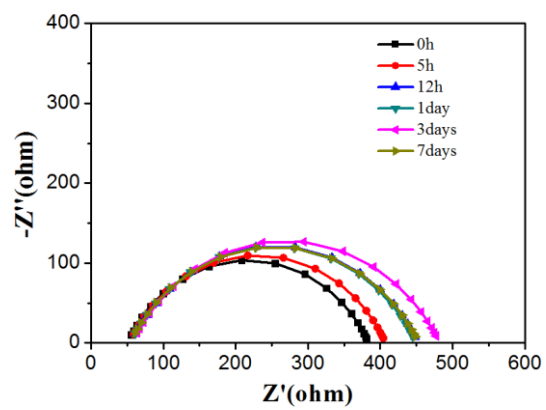

**Figure S7.** Impedance response with time evolution of the Li|GPE|Li.



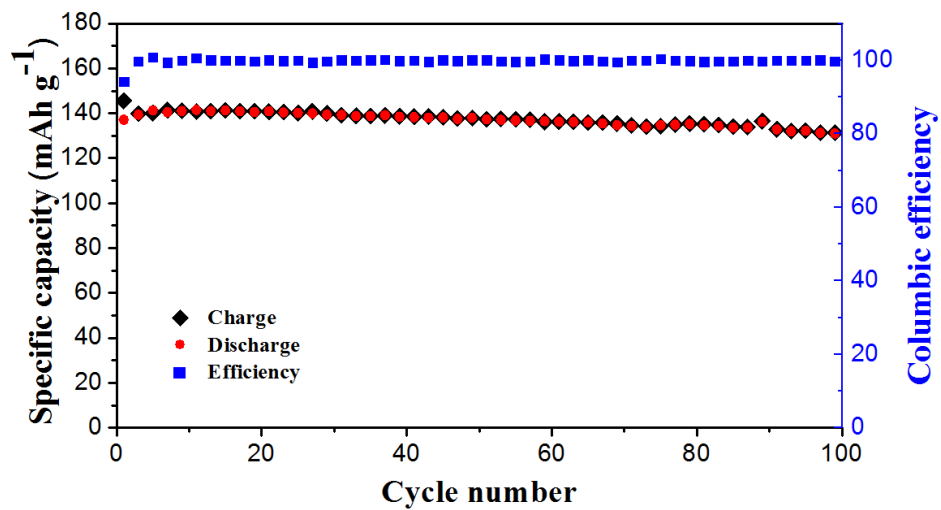

**Figure S8.** Battery performance of PEGDA based GPEs at the rate of 0.2 C at 20 °C.

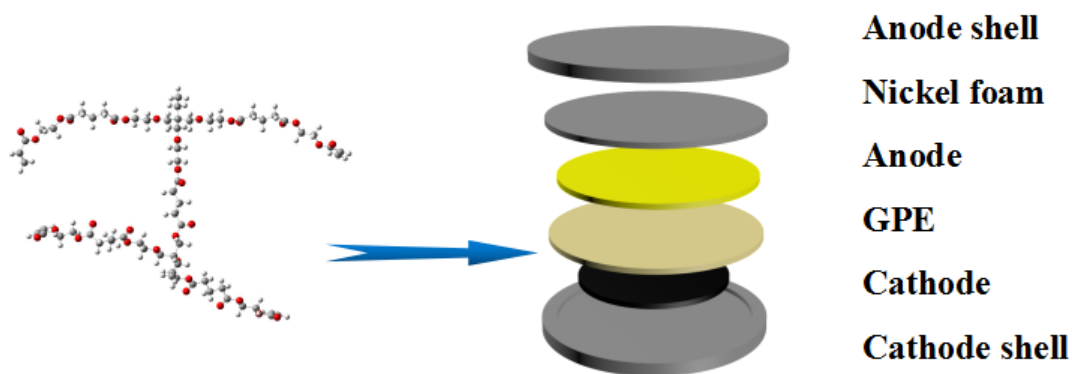

**Figure S9.** Structural illustration of GPE battery.

|                                               | Thermal safety (°C) | Ion Conductivity(mS/cm)   | Li <sup>+</sup> transference |
|-----------------------------------------------|---------------------|---------------------------|------------------------------|
| <b>PVA-CN solid electrolyte<sup>[1]</sup></b> | 160                 | 0.3 at room temperature   | 0.57                         |
| <b>PPC polymer electrolyte<sup>[2]</sup></b>  | -                   | 0.3 at 20°C               | -                            |
| <b>PINs<sup>[3]</sup></b>                     | 250                 | 0.532 at 20°C             | -                            |
| <b>PVDF/PEO SPE<sup>[4]</sup></b>             | 158                 | 0.303 at room temperature | -                            |
| <b>PVDF/HEC/PVDF<sup>[5]</sup></b>            | 290                 | 0.88 at room temperature  | 0.57                         |
| <b>TPU/PEO SPE<sup>[6]</sup></b>              | 314                 | 0.53 at 60°C              | 0.31                         |
| <b>PEGDA-ETPTA GPE</b>                        | 280                 | 0.56 at room temperature  | 0.72                         |

**Figure S10.** Physical and electrochemical properties of our produced GPE and other GPEs.

## References

- [1] Zhou, D.; He, Y.-B.; Liu, R.; Liu, M.; Du, H.; Li, B.; Cai, Q.; Yang, Q.-H.; Kang, F. *Adv. Energy Mater.* **2015**, 5, (15), 1500353.
- [2] Zhang, J.; Zhao, J.; Yue, L.; Wang, Q.; Chai, J.; Liu, Z.; Zhou, X.; Li, H.; Guo, Y.; Cui, G.; Chen, L. *Adv. Energy Mater.* **2015**, 5, (24), 1501082.
- [3] Zhang, P.; Li, M.; Yang, B.; Fang, Y.; Jiang, X.; Veith, G. M.; Sun, X. G.; Dai, S. *Adv. Mater.* **2015**, 27, (48), 8088-94.
- [4] Deng, F.; Wang, X.; He, D.; Hu, J.; Gong, C.; Ye, Y. S.; Xie, X.; Xue, Z. *J. Membr. Sci.* **2015**, 491, 82-89.
- [5] Zhang, M. Y.; Li, M. X.; Chang, Z.; Wang, Y. F.; Gao, J.; Zhu, Y. S.; Wu, Y. P.; Huang, W. *Electrochim. Acta* **2017**, 245, 752-759.
- [6] Tao, C.; Gao, M.-H.; Yin, B.-H.; Li, B.; Huang, Y.-P.; Xu, G.; Bao, J.-J. *Electrochim. Acta* **2017**, 257, 31-39.
